# Supplementary material for: Identifying Leafhopper Targets for Controlling Aster Yellows in Carrots and Celery
Source: MDPI journal article supplement (doi:10.3390/insects11070411), 2020-07-02
Supplement: s1 [file s1]

Table S3. Pairwise sequence differences between COI regions sequenced from collected leafhopper species (upper right - number of nucleotide differences, lower left - percent difference between sequences).

|                                               | Seq1  | Seq33 | Seq52 | Seq55 | Seq53 | Seq2  | Seq30 | Seq67 | Seq50 | Seq54 | Seq71 | Seq63 | Seq70 | Seq62 | Seq66 | Seq29 | Seq10 | Seq27 | Seq59 | Seq19 | Seq26 | Seq14 | Seq17 | Seq68 | Seq58 | Seq45 | Seq56 |     |
|-----------------------------------------------|-------|-------|-------|-------|-------|-------|-------|-------|-------|-------|-------|-------|-------|-------|-------|-------|-------|-------|-------|-------|-------|-------|-------|-------|-------|-------|-------|-----|
| Seq1 Balclutha sp. (13-2018)                  | -     | 0     | 2     | 4     | 75    | 96    | 94    | 93    | 93    | 93    | 78    | 93    | 78    | 90    | 87    | 92    | 87    | 87    | 87    | 87    | 87    | 87    | 95    | 95    | 95    | 96    | 101   |     |
| Seq33 Balclutha sp. (158-2018)                | 0.00  | -     | 0     | 2     | 78    | 104   | 96    | 95    | 93    | 93    | 76    | 93    | 76    | 116   | 87    | 94    | 88    | 88    | 88    | 88    | 88    | 88    | 94    | 94    | 94    | 95    | 103   |     |
| Seq52 Balclutha sp. (1064-2019)               | 0.45  | 0.00  | -     | 6     | 82    | 104   | 102   | 101   | 98    | 98    | 76    | 98    | 76    | 130   | 91    | 98    | 92    | 92    | 92    | 93    | 93    | 94    | 98    | 98    | 98    | 94    | 100   |     |
| Seq55 Balclutha sp. (1353-2019)               | 0.91  | 0.42  | 1.22  | -     | 77    | 106   | 101   | 100   | 97    | 97    | 77    | 96    | 77    | 133   | 90    | 96    | 91    | 91    | 91    | 91    | 91    | 91    | 93    | 95    | 95    | 99    | 98    |     |
| Seq53 Balclutha sp. (1282-2019)               | 17.01 | 16.53 | 16.70 | 15.65 | -     | 118   | 108   | 108   | 102   | 102   | 76    | 101   | 78    | 136   | 94    | 93    | 99    | 99    | 99    | 99    | 99    | 101   | 94    | 94    | 98    | 97    | 102   |     |
| Seq2 Psammotettix lividellus (43880)          | 21.77 | 22.81 | 22.51 | 22.94 | 25.54 | -     | 23    | 19    | 20    | 20    | 5     | 20    | 6     | 90    | 83    | 97    | 100   | 100   | 100   | 100   | 100   | 100   | 97    | 97    | 97    | 96    | 106   |     |
| Seq30 Psammotettix lividellus (1723-2019)     | 23.27 | 21.67 | 22.37 | 22.10 | 23.63 | 5.39  | -     | 6     | 9     | 9     | 8     | 12    | 9     | 114   | 73    | 86    | 90    | 90    | 90    | 92    | 92    | 90    | 90    | 90    | 93    | 88    | 91    |     |
| Seq67 Psammotettix lividellus (1520-2019)     | 22.96 | 21.40 | 22.10 | 21.83 | 23.58 | 4.44  | 1.32  | -     | 9     | 9     | 8     | 12    | 9     | 113   | 72    | 87    | 91    | 91    | 91    | 93    | 93    | 91    | 87    | 87    | 90    | 85    | 93    |     |
| Seq50 Psammotettix lividellus (1044-2019)     | 21.09 | 19.70 | 19.96 | 19.72 | 20.73 | 4.33  | 1.98  | 1.97  | -     | 0     | 0     | 3     | 1     | 114   | 71    | 84    | 87    | 87    | 87    | 89    | 89    | 87    | 85    | 85    | 88    | 84    | 91    |     |
| Seq54 Psammotettix lividellus (1315-2019)     | 21.09 | 19.70 | 19.96 | 19.72 | 20.73 | 4.33  | 1.98  | 1.97  | 0.00  | -     | 0     | 3     | 1     | 114   | 71    | 84    | 87    | 87    | 87    | 89    | 89    | 87    | 85    | 85    | 88    | 84    | 91    |     |
| Seq71 Psammotettix lividellus (1615-2019)     | 22.22 | 22.16 | 21.78 | 22.06 | 21.78 | 1.43  | 2.55  | 2.54  | 0.00  | 0.00  | -     | 0     | 1     | 59    | 58    | 65    | 71    | 71    | 71    | 71    | 71    | 71    | 66    | 66    | 66    | 67    | 72    |     |
| Seq63 Psammotettix lividellus (1438-2019)     | 21.09 | 19.70 | 19.92 | 19.47 | 20.49 | 4.33  | 2.62  | 2.61  | 0.61  | 0.61  | 0.00  | -     | 1     | 117   | 72    | 83    | 88    | 88    | 88    | 86    | 86    | 90    | 84    | 84    | 88    | 87    | 90    |     |
| Seq70 Psammotettix lividellus (1614-2019)     | 22.03 | 21.97 | 21.59 | 21.87 | 22.16 | 1.70  | 2.84  | 2.83  | 0.28  | 0.28  | 0.29  | 0.28  | -     | 60    | 59    | 67    | 72    | 72    | 72    | 72    | 72    | 72    | 68    | 68    | 68    | 69    | 73    |     |
| Seq62 Diplocolenus subg. verdanus (1436-2019) | 20.41 | 24.58 | 26.48 | 27.03 | 27.64 | 19.48 | 25.05 | 24.78 | 23.27 | 23.27 | 16.91 | 23.73 | 17.05 | -     | 47    | 141   | 136   | 136   | 136   | 138   | 138   | 134   | 140   | 139   | 139   | 139   | 143   |     |
| Seq66 Diplocolenus subg. Verdanus (1507-2019) | 19.73 | 18.43 | 18.53 | 18.29 | 19.11 | 17.97 | 16.01 | 15.75 | 14.46 | 14.46 | 16.62 | 14.60 | 16.76 | 9.57  | -     | 95    | 92    | 92    | 92    | 94    | 94    | 94    | 96    | 96    | 99    | 97    | 100   |     |
| Seq29 Collodonus cileitarius (109-2018)       | 20.86 | 19.92 | 19.96 | 19.51 | 18.90 | 21.00 | 18.82 | 19.00 | 17.07 | 17.07 | 18.62 | 16.84 | 19.03 | 28.66 | 19.31 | -     | 85    | 85    | 85    | 85    | 85    | 85    | 87    | 93    | 93    | 97    | 96    | 100 |
| Seq10 Agallia sp. (72-2018)                   | 19.73 | 18.64 | 18.74 | 18.50 | 20.12 | 21.65 | 19.74 | 19.91 | 17.72 | 17.72 | 20.34 | 17.85 | 20.45 | 27.70 | 18.74 | 17.28 | -     | 0     | 0     | 2     | 2     | 2     | 2     | 79    | 79    | 82    | 80    | 88  |
| Seq27 Agallia sp. (99-2018)                   | 19.73 | 18.64 | 18.74 | 18.50 | 20.12 | 21.65 | 19.74 | 19.91 | 17.72 | 17.72 | 20.34 | 17.85 | 20.45 | 27.70 | 18.74 | 17.28 | 0.00  | -     | 0     | 2     | 2     | 2     | 79    | 79    | 82    | 80    | 88    |     |
| Seq59 Agallia sp. (1394-2019)                 | 19.73 | 18.64 | 18.74 | 18.50 | 20.12 | 21.65 | 19.74 | 19.91 | 17.72 | 17.72 | 20.34 | 17.85 | 20.45 | 27.70 | 18.74 | 17.28 | 0.00  | 0.00  | -     | 2     | 2     | 2     | 79    | 79    | 82    | 80    | 88    |     |
| Seq19 Agallia sp. (86-2018)                   | 19.73 | 18.64 | 18.90 | 18.46 | 20.08 | 21.65 | 20.09 | 20.26 | 18.05 | 18.05 | 20.34 | 17.44 | 20.45 | 27.99 | 19.07 | 17.24 | 0.41  | 0.41  | 0.41  | -     | 0     | 4     | 79    | 79    | 83    | 82    | 88    |     |
| Seq26 Agallia sp. (98-2018)                   | 19.73 | 18.64 | 18.90 | 18.46 | 20.08 | 21.65 | 20.09 | 20.26 | 18.05 | 18.05 | 20.34 | 17.44 | 20.45 | 27.99 | 19.07 | 17.24 | 0.41  | 0.41  | 0.41  | 0.00  | -     | 4     | 79    | 79    | 83    | 82    | 88    |     |
| Seq14 Agallia sp. (78-2018)                   | 19.73 | 18.64 | 19.14 | 18.90 | 20.53 | 21.65 | 19.78 | 19.96 | 17.76 | 17.76 | 20.34 | 18.26 | 20.45 | 27.40 | 19.14 | 17.68 | 0.40  | 0.41  | 0.41  | 0.80  | 0.80  | -     | 81    | 81    | 84    | 80    | 90    |     |
| Seq17 Endria nimica (1740-2019)               | 21.54 | 19.92 | 19.96 | 19.31 | 19.11 | 21.00 | 19.69 | 19.00 | 17.28 | 17.28 | 18.91 | 17.04 | 19.32 | 28.46 | 19.51 | 18.90 | 16.06 | 16.06 | 16.06 | 16.02 | 16.02 | 16.46 | -     | 0     | 4     | 3     | 89    |     |
| Seq68 Endria nimica (1586-2019)               | 21.54 | 19.92 | 19.96 | 19.35 | 19.14 | 21.00 | 19.74 | 19.04 | 17.31 | 17.31 | 18.91 | 17.07 | 19.32 | 28.31 | 19.55 | 18.94 | 16.09 | 16.09 | 16.09 | 16.06 | 16.06 | 16.50 | 0.00  | -     | 4     | 3     | 89    |     |
| Seq58 Endria nimica (1382-2019)               | 21.54 | 19.92 | 19.14 | 20.16 | 19.96 | 21.00 | 20.39 | 19.69 | 17.92 | 17.92 | 18.91 | 17.89 | 19.32 | 28.31 | 20.16 | 19.76 | 16.70 | 16.70 | 16.70 | 16.87 | 16.87 | 17.11 | 0.80  | 0.80  | -     | 6     | 93    |     |
| Seq45 Endria nimica (916-2019)                | 21.77 | 20.13 | 20.37 | 19.92 | 19.72 | 20.82 | 19.34 | 18.64 | 17.14 | 17.14 | 19.20 | 17.65 | 19.60 | 28.37 | 19.76 | 19.51 | 16.29 | 16.29 | 16.29 | 16.63 | 16.63 | 16.33 | 0.61  | 0.61  | 1.22  | -     | 92    |     |
| Seq56 Elymana inornata (1358-2019)            | 22.90 | 21.82 | 21.79 | 21.14 | 20.73 | 22.94 | 19.91 | 20.31 | 18.50 | 18.50 | 20.63 | 18.26 | 20.74 | 29.07 | 20.33 | 20.33 | 17.89 | 17.89 | 17.89 | 17.85 | 17.85 | 18.29 | 18.09 | 18.13 | 18.94 | 18.70 | -     |     |
| Seq23 Paraphlepsius sp. (90-2018)             | 22.00 | 20.76 | 20.77 | 19.72 | 22.36 | 20.35 | 18.82 | 19.00 | 16.67 | 16.67 | 19.48 | 16.43 | 19.32 | 28.86 | 20.33 | 19.72 | 19.11 | 19.11 | 19.11 | 19.07 | 19.07 | 19.51 | 18.70 | 18.74 | 19.55 | 19.31 | 17.48 |     |
| Seq28 Paraphlepsius sp. (105-2018)            | 22.00 | 20.76 | 20.37 | 20.17 | 22.87 | 20.35 | 18.83 | 19.02 | 16.63 | 16.63 | 19.48 | 16.63 | 19.32 | 27.23 | 20.58 | 20.17 | 19.33 | 19.33 | 19.33 | 19.33 | 19.33 | 19.33 | 19.13 | 19.13 | 19.13 | 19.33 | 17.88 |     |
| Seq4 Empoasca fabae (39-2018)                 | 24.34 | 23.50 | 24.19 | 23.43 | 23.20 | 30.17 | 25.17 | 25.64 | 25.17 | 25.17 | 28.47 | 25.69 | 28.52 | 34.97 | 26.51 | 25.29 | 23.26 | 23.26 | 23.26 | 23.61 | 23.61 | 23.31 | 24.13 | 24.19 | 24.88 | 23.78 | 24.59 |     |
| Seq9 Empoasca fabae (71-2018)                 | 23.58 | 22.88 | 23.01 | 22.36 | 22.36 | 28.14 | 25.93 | 26.10 | 23.47 | 23.47 | 25.79 | 23.94 | 25.85 | 31.63 | 23.83 | 23.17 | 22.56 | 22.56 | 22.61 | 22.92 | 22.92 | 22.61 | 23.17 | 23.22 | 23.83 | 23.06 | 23.78 |     |
| Seq7 Empoasca fabae (56-2018)                 | 23.36 | 22.46 | 22.40 | 21.75 | 21.75 | 28.35 | 26.10 | 26.26 | 23.63 | 23.63 | 26.07 | 23.73 | 26.14 | 31.36 | 23.01 | 22.97 | 22.40 | 22.40 | 22.40 | 22.72 | 22.72 | 22.81 | 22.97 | 23.01 | 23.63 | 23.22 | 23.37 |     |
| Seq39 Empoasca fabae (196-2018)               | 23.36 | 22.46 | 22.40 | 21.75 | 21.75 | 28.35 | 26.10 | 26.26 | 23.63 | 23.63 | 26.07 | 23.73 | 26.14 | 31.57 | 23.22 | 22.97 | 22.40 | 22.40 | 22.40 | 22.72 | 22.72 | 22.81 | 22.97 | 23.01 | 23.63 | 23.22 | 23.58 |     |
| Seq43 Empoasca fabae (338-2018)               | 24.60 | 24.52 | 24.20 | 24.20 | 24.20 | 29.53 | 27.42 | 27.59 | 26.11 | 26.11 | 27.64 | 26.11 | 27.68 | 29.72 | 25.90 | 25.48 | 25.05 | 25.05 | 25.05 | 25.05 | 25.05 | 25.48 | 25.48 | 25.48 | 25.48 | 25.69 | 24.84 |     |
| Seq16 Empoasca fabae (81-2018)                | 24.72 | 28.60 | 30.69 | 30.83 | 30.63 | 29.59 | 34.51 | 34.65 | 32.38 | 32.38 | 32.74 | 32.79 | 27.20 | 28.27 | 32.11 | 31.64 | 32.25 | 32.25 | 32.11 | 32.39 | 32.39 | 31.98 | 31.85 | 31.71 | 31.71 | 31.77 | 33.47 |     |
| Seq42 Empoasca fabae (325-2018)               | 24.89 | 25.05 | 24.73 | 24.73 | 25.60 | 29.50 | 29.34 | 29.51 | 27.55 | 27.55 | 27.51 | 27.55 | 27.56 | 28.51 | 26.46 | 27.11 | 26.90 | 26.90 | 26.90 | 26.90 | 26.90 | 26.90 | 26.90 | 26.90 | 26.90 | 26.90 | 28.42 |     |
| Seq36 Empoasca fabae (185-2018)               | 26.53 | 27.43 | 27.51 | 27.51 | 26.86 | 29.69 | 30.02 | 30.19 | 28.82 | 28.82 | 27.22 | 28.82 | 27.56 | 30.65 | 29.04 | 27.95 | 29.26 | 29.26 | 29.26 | 29.26 | 29.26 | 29.26 | 28.38 | 28.38 | 28.38 | 28.38 | 30.13 |     |
| Seq32 Empoasca fabae (127-2018)               | 24.94 | 23.52 | 23.42 | 22.56 | 21.54 | 27.71 | 26.10 | 26.04 | 23.22 | 23.22 | 26.07 | 23.33 | 26.42 | 31.57 | 22.81 | 23.17 | 22.20 | 22.20 | 22.20 | 22.52 | 22.52 | 22.61 | 24.39 | 24.44 | 25.05 | 24.64 | 21.95 |     |
| Seq34 Empoasca fabae (173-2018)               | 24.94 | 23.52 | 23.83 | 22.97 | 21.95 | 27.71 | 25.71 | 25.66 | 23.27 | 23.27 | 26.07 | 23.73 | 26.42 | 31.43 | 23.22 | 23.58 | 22.61 | 22.61 | 22.61 | 22.92 | 22.92 | 22.65 | 24.80 | 24.85 | 25.46 | 24.69 | 22.36 |     |
| Seq13 Empoasca fabae (76-2018)                | 26.65 | 26.65 | 26.65 | 26.65 | 24.11 | 27.41 | 29.30 | 29.22 | 26.90 | 26.90 | 25.89 | 26.90 | 26.25 | 26.90 | 26.90 | 23.92 | 27.16 | 26.40 | 26.40 | 26.40 | 26.40 | 26.40 | 26.40 | 26.90 | 26.90 | 26.90 | 28.17 |     |
| Seq60 Graphocephala hieroglyphica (1424-2019) | 24.49 | 23.09 | 23.22 | 22.56 | 23.17 | 26.84 | 24.40 | 24.56 | 22.45 | 22.45 | 24.93 | 22.92 | 25.28 | 32.65 | 24.24 | 21.95 | 20.57 | 20.57 | 20.57 | 20.89 | 20.89 | 20.61 | 20.93 | 20.98 | 21.59 | 20.82 | 21.95 |     |
| Seq15 Erythroneura sp. (79-2018)              | 22.90 | 21.61 | 21.59 | 20.73 | 22.56 | 25.54 | 23.63 | 23.80 | 21.14 | 21.14 | 23.50 | 20.89 | 23.86 | 31.10 | 21.75 | 20.73 | 19.72 | 19.72 | 19.72 | 19.68 | 19.68 | 20.12 | 21.54 | 21.59 | 22.40 | 22.15 | 19.51 |     |
| Seq61 Forcipata loca (1435-2019)              | 20.86 | 19.92 | 19.96 | 18.90 | 20.73 | 24.89 | 23.41 | 23.36 | 21.14 | 21.14 | 23.50 | 20.89 | 23.58 | 31.50 | 22.76 | 20.93 | 17.68 | 17.68 | 17.68 | 17.65 | 17.65 | 18.09 | 21.75 | 21.79 | 22.61 | 22.36 | 21.34 |     |
| Seq25 Graphocephala sp. (97-2018)             | 22.62 | 21.61 | 21.34 | 21.13 | 23.64 | 23.33 | 22.57 | 22.30 | 20.08 | 20.08 | 19.77 | 20.08 | 20.17 | 26.78 | 20.92 | 20.08 | 19.25 | 19.25 | 19.25 | 19.25 | 19.25 | 19.25 | 21.97 | 21.97 | 21.97 | 22.18 | 21.34 |     |
| Seq31 Draeculacephala sp. (113-2018)          | 19.95 | 18.86 | 18.39 | 18.80 | 20.25 | 23.81 | 22.94 | 22.89 | 20.87 | 20.87 | 21.49 | 20.66 | 21.87 | 27.48 | 20.25 | 18.60 | 16.32 | 16.32 | 16.32 | 16.32 |       |       |       |       |       |       |       |     |

Table S3. Continued

| Seq23 | Seq28 | Seq4  | Seq9  | Seq7  | Seq39 | Seq43 | Seq16 | Seq42 | Seq36 | Seq32 | Seq34 | Seq13 | Seq60 | Seq15 | Seq61 | Seq25 | Seq31 | Seq64 | Seq46 | Seq69 | Seq72 | Seq37 | Seq40 | Seq20 | Seq35 | Seq3 | Seq49 | Seq37 | Seq38 | Seq5 | Seq41 |
|-------|-------|-------|-------|-------|-------|-------|-------|-------|-------|-------|-------|-------|-------|-------|-------|-------|-------|-------|-------|-------|-------|-------|-------|-------|-------|------|-------|-------|-------|------|-------|
| 97    | 97    | 92    | 104   | 103   | 103   | 109   | 109   | 110   | 117   | 110   | 110   | 105   | 108   | 101   | 92    | 100   | 88    | 88    | 89    | 93    | 93    | 107   | 102   | 105   | 126   | 117  | 121   | 112   | 121   | 146  | 147   |
| 98    | 98    | 98    | 108   | 106   | 106   | 114   | 135   | 114   | 124   | 111   | 111   | 105   | 109   | 102   | 94    | 102   | 89    | 88    | 90    | 95    | 95    | 109   | 104   | 108   | 130   | 130  | 124   | 121   | 131   | 144  | 155   |
| 102   | 98    | 104   | 113   | 110   | 110   | 114   | 151   | 114   | 126   | 115   | 117   | 105   | 114   | 106   | 98    | 102   | 89    | 92    | 95    | 101   | 99    | 113   | 109   | 114   | 135   | 130  | 128   | 121   | 131   | 144  | 155   |
| 97    | 97    | 101   | 110   | 107   | 107   | 114   | 152   | 114   | 126   | 111   | 113   | 105   | 111   | 102   | 93    | 101   | 91    | 91    | 92    | 101   | 97    | 111   | 105   | 111   | 131   | 131  | 125   | 122   | 132   | 144  | 155   |
| 110   | 110   | 100   | 110   | 107   | 107   | 114   | 151   | 118   | 123   | 106   | 108   | 95    | 114   | 111   | 102   | 113   | 98    | 97    | 99    | 108   | 104   | 111   | 113   | 116   | 144   | 134  | 124   | 122   | 143   | 151  | 160   |
| 94    | 94    | 121   | 130   | 131   | 131   | 137   | 137   | 136   | 136   | 128   | 128   | 108   | 124   | 118   | 115   | 108   | 110   | 110   | 111   | 99    | 99    | 113   | 121   | 120   | 139   | 126  | 126   | 140   | 147   | 157  | 178   |
| 86    | 84    | 108   | 118   | 119   | 119   | 119   | 157   | 125   | 127   | 119   | 117   | 109   | 111   | 108   | 107   | 100   | 103   | 102   | 103   | 98    | 94    | 102   | 111   | 110   | 105   | 129  | 116   | 129   | 139   | 156  | 167   |
| 87    | 85    | 110   | 119   | 120   | 120   | 120   | 158   | 126   | 128   | 119   | 117   | 109   | 112   | 109   | 107   | 99    | 103   | 102   | 103   | 99    | 95    | 102   | 110   | 109   | 108   | 128  | 116   | 129   | 139   | 156  | 167   |
| 82    | 80    | 108   | 115   | 116   | 116   | 123   | 159   | 127   | 132   | 114   | 114   | 106   | 110   | 104   | 104   | 96    | 101   | 100   | 101   | 94    | 90    | 98    | 110   | 107   | 129   | 129  | 116   | 131   | 143   | 154  | 165   |
| 82    | 80    | 108   | 115   | 116   | 116   | 123   | 159   | 127   | 132   | 114   | 114   | 106   | 110   | 104   | 104   | 96    | 101   | 100   | 101   | 94    | 90    | 98    | 110   | 107   | 129   | 129  | 116   | 131   | 143   | 154  | 165   |
| 68    | 68    | 82    | 90    | 91    | 91    | 97    | 95    | 96    | 95    | 91    | 91    | 87    | 87    | 82    | 82    | 69    | 75    | 75    | 75    | 70    | 70    | 78    | 85    | 88    | 111   | 93   | 94    | 104   | 108   | 107  | 106   |
| 81    | 80    | 111   | 118   | 117   | 117   | 123   | 162   | 127   | 132   | 115   | 117   | 106   | 113   | 103   | 103   | 96    | 100   | 101   | 104   | 93    | 89    | 97    | 111   | 110   | 130   | 129  | 115   | 131   | 143   | 154  | 165   |
| 68    | 68    | 83    | 91    | 92    | 92    | 98    | 96    | 97    | 97    | 93    | 93    | 89    | 89    | 84    | 83    | 71    | 77    | 77    | 77    | 71    | 71    | 78    | 86    | 88    | 111   | 94   | 95    | 105   | 109   | 111  | 110   |
| 142   | 131   | 150   | 155   | 154   | 155   | 140   | 132   | 132   | 141   | 155   | 154   | 106   | 160   | 153   | 155   | 128   | 133   | 139   | 140   | 133   | 133   | 141   | 150   | 160   | 179   | 125  | 152   | 141   | 144   | 147  | 164   |
| 100   | 99    | 114   | 117   | 113   | 114   | 122   | 158   | 122   | 133   | 112   | 114   | 106   | 119   | 107   | 112   | 100   | 98    | 97    | 100   | 96    | 92    | 98    | 110   | 121   | 138   | 120  | 110   | 131   | 139   | 146  | 155   |
| 97    | 97    | 109   | 114   | 113   | 113   | 120   | 156   | 125   | 128   | 114   | 116   | 107   | 108   | 102   | 103   | 96    | 90    | 89    | 93    | 101   | 97    | 93    | 111   | 109   | 148   | 126  | 115   | 135   | 143   | 154  | 165   |
| 94    | 93    | 100   | 111   | 110   | 110   | 118   | 159   | 124   | 134   | 109   | 111   | 104   | 101   | 97    | 87    | 92    | 79    | 80    | 81    | 96    | 92    | 89    | 105   | 97    | 136   | 119  | 110   | 125   | 131   | 158  | 167   |
| 94    | 93    | 100   | 111   | 110   | 110   | 118   | 159   | 124   | 134   | 109   | 111   | 104   | 101   | 97    | 87    | 92    | 79    | 80    | 81    | 96    | 92    | 89    | 105   | 97    | 136   | 119  | 110   | 125   | 131   | 158  | 167   |
| 94    | 93    | 100   | 111   | 110   | 110   | 118   | 158   | 124   | 134   | 109   | 111   | 104   | 101   | 97    | 87    | 92    | 79    | 80    | 81    | 96    | 92    | 89    | 105   | 97    | 136   | 119  | 110   | 125   | 131   | 158  | 167   |
| 94    | 93    | 102   | 113   | 112   | 112   | 118   | 160   | 124   | 134   | 111   | 113   | 104   | 103   | 97    | 87    | 92    | 79    | 82    | 83    | 96    | 92    | 89    | 107   | 99    | 138   | 119  | 110   | 125   | 131   | 158  | 167   |
| 94    | 93    | 102   | 113   | 112   | 112   | 118   | 160   | 124   | 134   | 111   | 113   | 104   | 103   | 97    | 87    | 92    | 79    | 82    | 83    | 96    | 92    | 89    | 107   | 99    | 138   | 119  | 110   | 125   | 131   | 158  | 167   |
| 96    | 93    | 100   | 111   | 112   | 112   | 118   | 157   | 124   | 134   | 111   | 111   | 104   | 101   | 99    | 89    | 92    | 81    | 82    | 81    | 98    | 94    | 91    | 107   | 97    | 138   | 119  | 112   | 125   | 131   | 158  | 167   |
| 92    | 92    | 104   | 114   | 113   | 113   | 120   | 157   | 120   | 130   | 120   | 122   | 106   | 103   | 106   | 107   | 105   | 98    | 98    | 101   | 98    | 94    | 104   | 108   | 117   | 144   | 124  | 110   | 129   | 141   | 150  | 159   |
| 92    | 92    | 104   | 114   | 113   | 113   | 120   | 156   | 120   | 130   | 120   | 122   | 106   | 103   | 106   | 107   | 105   | 98    | 98    | 101   | 97    | 94    | 104   | 108   | 117   | 144   | 124  | 110   | 129   | 141   | 150  | 159   |
| 96    | 92    | 107   | 117   | 116   | 116   | 120   | 156   | 120   | 130   | 123   | 125   | 106   | 106   | 110   | 111   | 105   | 98    | 101   | 104   | 100   | 98    | 108   | 111   | 120   | 147   | 124  | 114   | 129   | 141   | 150  | 159   |
| 95    | 93    | 102   | 113   | 114   | 114   | 121   | 156   | 120   | 130   | 121   | 121   | 106   | 102   | 109   | 110   | 106   | 100   | 99    | 100   | 101   | 97    | 107   | 108   | 115   | 145   | 123  | 112   | 129   | 141   | 151  | 160   |
| 86    | 86    | 106   | 117   | 115   | 116   | 117   | 165   | 131   | 138   | 108   | 110   | 111   | 108   | 96    | 105   | 102   | 103   | 105   | 106   | 101   | 97    | 100   | 113   | 111   | 131   | 126  | 109   | 131   | 139   | 150  | 156   |
| -     | 0     | 105   | 109   | 108   | 108   | 115   | 152   | 117   | 129   | 103   | 105   | 104   | 109   | 100   | 93    | 105   | 97    | 97    | 98    | 102   | 98    | 93    | 106   | 104   | 118   | 117  | 105   | 123   | 128   | 142  | 153   |
| 0.00  | -     | 103   | 107   | 107   | 107   | 115   | 141   | 117   | 129   | 102   | 103   | 104   | 107   | 100   | 93    | 105   | 97    | 96    | 96    | 98    | 98    | 93    | 105   | 102   | 117   | 117  | 105   | 123   | 128   | 142  | 153   |
| 24.36 | 24.52 | -     | 4     | 6     | 5     | 4     | 48    | 18    | 19    | 69    | 67    | 55    | 82    | 95    | 86    | 83    | 103   | 104   | 101   | 115   | 111   | 107   | 94    | 89    | 107   | 115  | 105   | 100   | 107   | 66   | 83    |
| 22.15 | 22.25 | 0.93  | -     | 4     | 3     | 9     | 52    | 21    | 30    | 70    | 70    | 61    | 92    | 102   | 91    | 90    | 107   | 108   | 105   | 125   | 121   | 110   | 107   | 94    | 141   | 126  | 116   | 114   | 123   | 66   | 83    |
| 21.95 | 22.25 | 1.40  | 0.80  | -     | 1     | 10    | 52    | 21    | 30    | 68    | 70    | 60    | 94    | 100   | 90    | 90    | 106   | 107   | 106   | 123   | 119   | 109   | 103   | 95    | 141   | 126  | 114   | 116   | 125   | 66   | 81    |
| 21.95 | 22.25 | 1.16  | 0.61  | 0.20  | -     | 9     | 51    | 20    | 29    | 69    | 71    | 60    | 93    | 101   | 90    | 90    | 106   | 107   | 106   | 124   | 120   | 109   | 104   | 95    | 140   | 127  | 115   | 115   | 124   | 65   | 82    |
| 24.42 | 24.42 | 0.98  | 1.91  | 2.12  | 1.91  | -     | 35    | 26    | 34    | 77    | 77    | 66    | 100   | 108   | 97    | 98    | 114   | 115   | 113   | 127   | 127   | 116   | 105   | 95    | 143   | 133  | 116   | 120   | 129   | 71   | 87    |
| 30.83 | 29.25 | 11.19 | 10.57 | 10.57 | 10.37 | 7.42  | -     | 29    | 51    | 113   | 112   | 60    | 136   | 145   | 139   | 124   | 145   | 151   | 150   | 166   | 165   | 153   | 143   | 135   | 182   | 136  | 157   | 193   | 130   | 69   | 92    |
| 25.38 | 25.38 | 4.50  | 4.56  | 4.56  | 4.34  | 5.62  | 6.24  | -     | 32    | 78    | 78    | 62    | 103   | 112   | 105   | 105   | 117   | 116   | 116   | 128   | 128   | 118   | 108   | 103   | 151   | 135  | 121   | 121   | 127   | 67   | 88    |
| 28.17 | 28.17 | 4.79  | 6.55  | 6.55  | 6.33  | 7.39  | 9.46  | 6.93  | -     | 88    | 88    | 59    | 111   | 118   | 113   | 112   | 125   | 125   | 124   | 139   | 139   | 130   | 113   | 108   | 156   | 134  | 124   | 214   | 131   | 72   | 94    |
| 20.93 | 21.21 | 16.05 | 14.26 | 13.85 | 14.05 | 16.35 | 22.97 | 16.92 | 19.21 | -     | 2     | 63    | 82    | 92    | 86    | 97    | 99    | 98    | 99    | 127   | 123   | 111   | 104   | 95    | 129   | 126  | 114   | 113   | 122   | 101  | 109   |
| 21.34 | 21.41 | 15.62 | 14.29 | 14.26 | 14.46 | 16.35 | 22.81 | 16.92 | 19.21 | 0.41  | -     | 63    | 82    | 94    | 88    | 97    | 101   | 100   | 99    | 129   | 125   | 113   | 104   | 93    | 129   | 126  | 116   | 113   | 122   | 101  | 109   |
| 26.40 | 26.40 | 15.90 | 15.48 | 15.23 | 15.23 | 16.67 | 15.23 | 15.74 | 14.97 | 15.99 | 15.99 | -     | 86    | 91    | 83    | 77    | 89    | 89    | 89    | 108   | 108   | 98    | 100   | 89    | 134   | 110  | 113   | 97    | 99    | 101  | 98    |
| 22.15 | 22.25 | 19.11 | 18.78 | 19.14 | 18.94 | 21.23 | 27.70 | 22.34 | 24.24 | 16.70 | 16.73 | 21.83 | -     | 94    | 83    | 76    | 89    | 87    | 87    | 113   | 109   | 118   | 97    | 106   | 135   | 116  | 107   | 115   | 124   | 131  | 145   |
| 20.33 | 20.79 | 22.04 | 20.73 | 20.33 | 20.53 | 22.93 | 29.41 | 24.30 | 25.76 | 18.70 | 19.11 | 23.10 | 19.11 | -     | 87    | 88    | 96    | 96    | 97    | 99    | 95    | 108   | 98    | 99    | 128   | 122  | 108   | 106   | 111   | 135  | 145   |
| 18.90 | 19.33 | 19.95 | 18.50 | 18.29 | 18.29 | 20.59 | 28.19 | 22.78 | 24.67 | 17.48 | 17.89 | 21.07 | 16.87 | 17.68 | -     | 80    | 85    | 87    | 86    | 113   | 109   | 104   | 107   | 90    | 128   | 123  | 111   | 112   | 118   | 137  | 152   |
| 21.97 | 21.97 | 19.90 | 18.83 | 18.83 | 18.83 | 20.76 | 25.89 | 22.73 | 24.40 | 20.29 | 20.29 | 19.54 | 15.90 | 18.41 | -     | -     | 77    | 77    | 76    | 102   | 102   | 102   | 92    | 106   | 141   | 110  | 101   | 117   | 123   | 132  | 144   |
| 20.04 | 20.17 | 24.35 | 22.11 | 21.90 | 21.90 | 24.20 | 29.90 | 25.38 | 27.29 | 20.45 | 20.87 | 22.59 | 18.39 | 19.83 | 17.56 | 16.11 | -     | 2     | 2     | 97    | 97    | 96    | 88    | 97    | 138   | 123  | 115   | 116   | 128   | 143  | 155   |
| 19.72 | 19.96 | 24.19 | 22.00 | 21.79 | 21.79 | 24.42 | 30.69 | 25.16 | 27.29 | 19.96 | 20.37 | 22.59 | 17.72 | 19.51 | 17.68 | 16.11 | 0.41  | -     | 4     | 102   | 98    | 95    | 88    | 98    | 138   | 124  | 115   | 116   | 128   | 143  | 154   |
| 19.92 | 19.96 | 23.54 | 21.43 | 21.59 | 21.59 | 23.99 | 30.55 | 25.16 | 27.07 | 20.16 | 20.20 | 22.59 | 17.76 | 19.72 | 17.48 | 15.90 | 0.41  | 0.80  | -     | 104   | 100   | 99    | 88    | 95    | 138   | 124  | 118   | 117   | 1     |      |       |

Table S3. Continued

| Seq21 | Seq51 | Seq6  | Seq12 | Seq24 | Seq47 | Seq48 | Seq11 | Seq65 | Seq22 | Seq8  | Seq44 | Seq18 |
|-------|-------|-------|-------|-------|-------|-------|-------|-------|-------|-------|-------|-------|
| 131   | 125   | 140   | 144   | 143   | 142   | 156   | 122   | 172   | 135   | 151   | 149   | 141   |
| 137   | 128   | 145   | 143   | 148   | 147   | 161   | 122   | 176   | 144   | 181   | 145   | 148   |
| 139   | 130   | 149   | 143   | 148   | 152   | 167   | 122   | 176   | 147   | 194   | 147   | 150   |
| 138   | 133   | 145   | 143   | 148   | 149   | 165   | 121   | 176   | 149   | 193   | 146   | 151   |
| 139   | 137   | 141   | 145   | 148   | 149   | 161   | 118   | 173   | 154   | 200   | 151   | 157   |
| 154   | 149   | 150   | 145   | 155   | 154   | 171   | 118   | 182   | 158   | 169   | 150   | 161   |
| 145   | 141   | 141   | 133   | 142   | 142   | 161   | 117   | 167   | 150   | 181   | 135   | 143   |
| 143   | 141   | 141   | 133   | 142   | 142   | 161   | 118   | 168   | 154   | 181   | 136   | 143   |
| 147   | 138   | 137   | 136   | 140   | 139   | 158   | 116   | 171   | 156   | 187   | 147   | 153   |
| 147   | 138   | 137   | 136   | 140   | 139   | 158   | 116   | 171   | 156   | 187   | 147   | 153   |
| 109   | 114   | 105   | 111   | 109   | 108   | 125   | 97    | 140   | 112   | 114   | 120   | 113   |
| 147   | 138   | 136   | 136   | 140   | 142   | 161   | 116   | 171   | 156   | 187   | 147   | 153   |
| 111   | 115   | 105   | 111   | 109   | 108   | 125   | 97    | 140   | 114   | 114   | 121   | 115   |
| 154   | 170   | 186   | 148   | 176   | 188   | 204   | 118   | 187   | 186   | 183   | 153   | 169   |
| 144   | 128   | 142   | 143   | 146   | 146   | 164   | 118   | 179   | 154   | 199   | 152   | 160   |
| 154   | 150   | 127   | 133   | 135   | 136   | 153   | 110   | 169   | 156   | 192   | 148   | 158   |
| 142   | 140   | 119   | 120   | 123   | 123   | 140   | 100   | 150   | 140   | 177   | 146   | 147   |
| 142   | 140   | 119   | 120   | 123   | 123   | 140   | 100   | 150   | 140   | 176   | 146   | 147   |
| 142   | 140   | 118   | 120   | 123   | 123   | 140   | 100   | 150   | 140   | 174   | 146   | 147   |
| 142   | 141   | 118   | 120   | 123   | 125   | 142   | 100   | 150   | 141   | 174   | 146   | 147   |
| 142   | 141   | 118   | 120   | 123   | 125   | 142   | 100   | 150   | 141   | 174   | 146   | 147   |
| 142   | 142   | 121   | 120   | 123   | 123   | 140   | 100   | 150   | 142   | 177   | 146   | 147   |
| 133   | 149   | 122   | 122   | 127   | 128   | 144   | 103   | 153   | 147   | 190   | 147   | 148   |
| 133   | 149   | 122   | 122   | 127   | 128   | 143   | 103   | 153   | 147   | 189   | 147   | 148   |
| 133   | 147   | 126   | 122   | 127   | 131   | 146   | 103   | 153   | 146   | 190   | 147   | 148   |
| 133   | 151   | 125   | 123   | 128   | 127   | 143   | 103   | 154   | 148   | 192   | 147   | 148   |
| 135   | 139   | 143   | 143   | 147   | 148   | 163   | 117   | 173   | 143   | 187   | 146   | 160   |
| 141   | 133   | 136   | 135   | 140   | 141   | 160   | 112   | 165   | 123   | 154   | 105   | 142   |
| 141   | 129   | 136   | 135   | 140   | 139   | 156   | 112   | 165   | 120   | 145   | 105   | 142   |
| 91    | 140   | 126   | 118   | 126   | 126   | 145   | 106   | 151   | 125   | 183   | 132   | 131   |
| 102   | 149   | 134   | 131   | 135   | 134   | 153   | 108   | 174   | 138   | 206   | 152   | 151   |
| 101   | 147   | 132   | 132   | 135   | 135   | 154   | 109   | 175   | 140   | 206   | 153   | 150   |
| 101   | 146   | 132   | 132   | 135   | 135   | 154   | 109   | 175   | 139   | 206   | 153   | 150   |
| 107   | 150   | 139   | 136   | 143   | 142   | 159   | 109   | 180   | 132   | 191   | 159   | 155   |
| 102   | 187   | 178   | 140   | 166   | 178   | 196   | 109   | 188   | 172   | 198   | 160   | 153   |
| 103   | 153   | 146   | 140   | 150   | 149   | 166   | 110   | 187   | 137   | 184   | 151   | 151   |
| 108   | 163   | 151   | 145   | 155   | 154   | 171   | 111   | 192   | 142   | 185   | 157   | 151   |
| 90    | 140   | 134   | 136   | 140   | 140   | 156   | 112   | 171   | 122   | 207   | 154   | 152   |
| 90    | 142   | 136   | 136   | 140   | 140   | 156   | 112   | 171   | 122   | 207   | 154   | 152   |
| 77    | 132   | 111   | 118   | 118   | 117   | 135   | 107   | 155   | 113   | 142   | 137   | 114   |
| 123   | 150   | 140   | 141   | 144   | 143   | 157   | 116   | 176   | 143   | 205   | 153   | 161   |
| 125   | 145   | 139   | 139   | 142   | 143   | 158   | 114   | 175   | 130   | 193   | 145   | 146   |
| 127   | 144   | 119   | 122   | 122   | 123   | 146   | 103   | 161   | 128   | 191   | 145   | 150   |
| 130   | 131   | 122   | 127   | 128   | 127   | 146   | 102   | 162   | 141   | 178   | 144   | 143   |
| 129   | 132   | 128   | 130   | 133   | 134   | 149   | 108   | 162   | 134   | 188   | 150   | 145   |
| 128   | 136   | 129   | 130   | 133   | 134   | 151   | 108   | 162   | 137   | 196   | 150   | 144   |
| 128   | 138   | 131   | 131   | 134   | 134   | 151   | 108   | 163   | 139   | 195   | 149   | 146   |
| 146   | 145   | 140   | 135   | 138   | 143   | 160   | 113   | 170   | 146   | 201   | 154   | 153   |
| 146   | 142   | 135   | 135   | 138   | 139   | 158   | 113   | 170   | 143   | 200   | 154   | 153   |
| 140   | 140   | 118   | 120   | 123   | 124   | 146   | 102   | 155   | 137   | 189   | 147   | 148   |
| 121   | 139   | 141   | 131   | 140   | 141   | 158   | 112   | 169   | 137   | 183   | 128   | 122   |
| 119   | 156   | 131   | 126   | 133   | 133   | 144   | 110   | 166   | 127   | 196   | 142   | 141   |
| 162   | 178   | 177   | 171   | 176   | 177   | 191   | 128   | 193   | 147   | 212   | 160   | 183   |
| 146   | 155   | 152   | 146   | 157   | 156   | 170   | 120   | 184   | 148   | 173   | 151   | 152   |
| 132   | 150   | 142   | 138   | 146   | 147   | 162   | 118   | 171   | 145   | 187   | 142   | 141   |
| 144   | 146   | 154   | 144   | 155   | 154   | 165   | 121   | 185   | 103   | 183   | 152   | 145   |
| 150   | 154   | 159   | 150   | 160   | 159   | 170   | 121   | 192   | 108   | 184   | 153   | 156   |
| 123   | 175   | 173   | 179   | 178   | 177   | 194   | 154   | 217   | 145   | 198   | 191   | 176   |
| 135   | 190   | 184   | 179   | 189   | 188   | 205   | 151   | 224   | 155   | 210   | 190   | 193   |
| -     | 172   | 157   | 155   | 161   | 160   | 176   | 125   | 191   | 148   | 205   | 179   | 169   |
| 36.99 | -     | 156   | 153   | 154   | 159   | 175   | 133   | 184   | 150   | 231   | 175   | 158   |
| 33.76 | 31.71 | -     | 21    | 18    | 19    | 45    | 14    | 82    | 164   | 215   | 177   | 165   |
| 34.60 | 34.62 | 4.84  | -     | 8     | 7     | 45    | 13    | 71    | 147   | 170   | 176   | 156   |
| 34.62 | 32.29 | 3.84  | 1.84  | -     | 1     | 42    | 15    | 73    | 157   | 205   | 180   | 165   |
| 34.41 | 32.32 | 3.93  | 1.61  | 0.21  | -     | 43    | 14    | 73    | 162   | 216   | 179   | 164   |
| 37.85 | 35.57 | 9.28  | 10.37 | 8.96  | 8.92  | -     | 41    | 94    | 183   | 231   | 194   | 182   |
| 34.92 | 37.15 | 3.98  | 3.69  | 4.26  | 3.98  | 11.65 | -     | 60    | 124   | 129   | 133   | 119   |
| 41.52 | 40.71 | 18.22 | 16.06 | 16.22 | 16.22 | 20.89 | 16.76 | -     | 184   | 192   | 198   | 191   |
| 34.42 | 32.68 | 35.73 | 35.94 | 35.36 | 35.29 | 39.87 | 34.64 | 43.91 | -     | 213   | 158   | 145   |
| 43.71 | 46.57 | 43.26 | 38.03 | 42.62 | 43.55 | 46.48 | 36.03 | 42.01 | 46.10 | -     | 125   | 174   |
| 40.04 | 39.59 | 40.05 | 39.82 | 40.72 | 40.50 | 43.89 | 37.05 | 44.70 | 38.63 | 28.03 | -     | 161   |
| 36.03 | 33.83 | 35.33 | 34.82 | 35.33 | 35.12 | 38.97 | 33.24 | 41.61 | 33.49 | 37.34 | 36.02 | -     |
